# 1 **Genome-wide association study identifies seven novel loci associating with** 2 **circulating cytokines and cell adhesion molecules in Finns**

3 Eeva Sliz<sup>1,2,3</sup>, Marita Kalaoja<sup>1,2,3</sup>, Ari Ahola-Olli<sup>4,5</sup>, Olli Raitakari<sup>5,6</sup>, Markus Perola<sup>7,8,9</sup>, Veikko Salomaa<sup>7</sup>, Terho  
4 Lehtimäki<sup>10</sup>, Toni Karhu<sup>3,11</sup>, Heimo Viinamäki<sup>12</sup>, Marko Salmi<sup>13</sup>, Kristiina Santalahti<sup>13</sup>, Sirpa Jalkanen<sup>13</sup>, Jari  
5 Jokelainen<sup>2,14</sup>, Sirkka Keinänen-Kiukaanniemi<sup>2,14,15</sup>, Minna Männikkö<sup>16</sup>, Karl-Heinz Herzig<sup>3,11,17,18</sup>, Marjo-Riitta  
6 Järvelin<sup>2,3,19,20</sup>, Sylvain Sebert<sup>2,3,21,\*</sup>, Johannes Kettunen<sup>1,2,3,\*</sup>

7 \*these authors contributed equally

- 8 1. Computational Medicine, Faculty of Medicine, University of Oulu, Oulu, Finland
- 9 2. Center for Life Course Health Research, University of Oulu, Oulu, Finland
- 10 3. Biocenter Oulu, Oulu, Finland
- 11 4. Department of Internal Medicine, Satakunta Central Hospital, Pori, Finland.
- 12 5. Research Centre of Applied and Preventive Cardiovascular Medicine, University of Turku, Turku,  
13 Finland
- 14 6. Department of Clinical Physiology and Nuclear Medicine, Turku University Hospital, Turku, Finland
- 15 7. National Institute for Health and Welfare, Helsinki, Finland
- 16 8. Institute for Molecular Medicine Finland, University of Helsinki, Helsinki, Finland
- 17 9. University of Tartu, Estonian Genome Center, Tartu, Estonia
- 18 10. Department of Clinical Chemistry, Fimlab Laboratories, and Finnish Cardiovascular Research Center  
19 - Tampere, Faculty of Medicine and Health Technology, Tampere University, Tampere, Finland
- 20 11. Institute of Biomedicine, University of Oulu, Oulu, Finland
- 21 12. Department of Psychiatry, University of Eastern Finland, and Kuopio University Hospital, Kuopio,  
22 Finland
- 23 13. Medicity Research Laboratory and Institute of Biomedicine, University of Turku, Turku, Finland
- 24 14. Unit of General Practice, Oulu University Hospital, Oulu, Finland
- 25 15. Oulu Deaconess Institute/Diapolis Oy Research Unit, Oulu, Finland

- 26 16. Northern Finland Birth Cohorts, Faculty of Medicine, University of Oulu, Oulu, Finland
- 27 17. Medical Research Center (MRC), University of Oulu, and Oulu University Hospital, Oulu, Finland
- 28 18. Department of Gastroenterology and Metabolism, Poznan University of Medical Sciences, Poznan,  
29 Poland
- 30 19. Department of Epidemiology and Biostatistics, MRC-PHE Centre for Environment and Health,  
31 Imperial College London, London, UK
- 32 20. Unit of Primary Care, Oulu University Hospital, Oulu, Finland
- 33 21. Department of Genomics and Complex Diseases, School of Public Health, Imperial College London,  
34 UK

35 **Corresponding author:**

36 Johannes Kettunen

37 *Address:* Faculty of Medicine, Computational Medicine, Center For Life Course Health Research, Aapistie 5A,  
38 P.O.Box 5000, 90014 University of Oulu, Oulu, Finland

39 *Phone:* +358 50 562 9718

40 *E-mail:* johannes.kettunen@oulu.fi

41

42 **Abbreviations:** GWAS, genome-wide association study; IL1 $\alpha$ , interleukin 1-alpha; IL1 $\beta$ , interleukin 1-beta;  
43 IL1ra, interleukin 1 receptor antagonist; IL4, interleukin 4; IL6, interleukin 6; IL8, interleukin 8; IL17,  
44 interleukin 17; IP10, interferon gamma-induced protein 10; MAF, minor allele frequency; MCP1, monocyte  
45 chemoattractant protein 1; NFBC1966, Northern Finland Birth Cohort 1966; PAI-1, plasminogen activator  
46 inhibitor 1; sCD40L, soluble CD40 ligand; sE-selectin, soluble E-selectin; sICAM-1, soluble intercellular cell  
47 adhesion molecule 1; sVCAM-1, soluble vascular cell adhesion molecule 1; TNF $\alpha$ , tumor necrosis factor alpha;  
48 VEGF, vascular endothelial growth factor

## 49 Abstract

50 **Background:** Inflammatory processes contribute to the pathophysiology of multiple chronic conditions.  
51 Genetic factors play a crucial role in modulating the inflammatory load, but the exact mechanisms are  
52 incompletely understood.

53 **Methods:** To add understanding to the molecular mechanisms in inflammation, we performed a genome-  
54 wide association study (GWAS) on 16 circulating cytokines and cell adhesion molecules (inflammatory  
55 phenotypes) in Northern Finland Birth Cohort 1966 (NFBC1966, N=5,284). A subsequent meta-analysis was  
56 completed for 10 phenotypes available in a GWAS of three other Finnish population cohorts adding up to  
57 13,577 individuals in the study. Complementary association tests were performed to study the effect of the  
58 ABO blood types on soluble adhesion molecule levels.

59 **Results:** We identified seven novel and confirmed six previously reported loci associating with at least one of  
60 the studied inflammatory phenotypes ( $p < 3.1 \times 10^{-9}$ ). We observed three loci associating with the  
61 concentration of soluble vascular cell adhesion molecule-1 (sVCAM-1), one of which is the *ABO* locus that has  
62 been previously associated with soluble E-selectin (sE-selectin) and intercellular adhesion molecule-1  
63 (sICAM-1) levels. Results from the complementary analyses suggest that the blood type B associates primarily  
64 with the concentration of sVCAM-1 while the A1 subtype shows a robust effect on sE-selectin and sICAM-1  
65 levels. Furthermore, the genotypes in the *ABO* locus associating with higher soluble adhesion molecule levels  
66 tend to associate with lower low-density lipoprotein cholesterol level and lower cardiovascular disease risk.

67 **Conclusion:** The present results extend the knowledge about genetic factors contributing to the  
68 inflammatory load. Our findings suggest that two distinct mechanisms contribute to the soluble adhesion  
69 molecule levels at the *ABO* locus. The negative correlation between the genetic effects on soluble adhesion  
70 molecule levels and cardiovascular traits in this locus further suggests that increased soluble adhesion  
71 molecule levels per se may not be a risk factor for cardiovascular disease.

## 72 Introduction

73 It is currently established that inflammatory load may play a role in the etiology of autoimmune and  
74 infectious diseases, but also in a broad range of other diseases, such as chronic cardio-metabolic disorders  
75 (1), neurodegenerative diseases (2), and cancer (3). The risk for these diseases increases with age (4), and  
76 due to the world's aging population (5), their prevalence is likely to expand. Moreover, these diseases often  
77 co-occur which is likely due to shared inflammation related pathophysiology (6).

78 Inflammation is the body's physiological response to harmful stimuli involving multiple molecular and cellular  
79 interactions attempting to restore disturbances in tissue or systemic homeostasis (7). Circulating cytokines,  
80 growth factors, chemokines, and cell adhesion molecules (hereafter inflammatory phenotypes) are  
81 fundamental mediators of inflammatory responses. Genes encoding these molecules and their receptors play  
82 a crucial role in mediating the related functions. Previous studies have identified loci associating with levels  
83 of inflammatory phenotypes (8–10), but the understanding of the exact regulatory mechanisms is still  
84 incomplete.

85 To add insights to the genetic mechanisms contributing to the inflammatory load, we performed a genome-  
86 wide association study (GWAS) of 16 circulating inflammatory phenotypes in 5,284 individuals from Northern  
87 Finland Birth Cohort 1966 (NFBC1966), and a subsequent meta-analysis of 10 phenotypes in three other  
88 Finnish population cohorts (8) adding up to a total of 13,577 individuals in the study. We report identification  
89 of seven novel and replication of six loci associating with levels of the circulating inflammatory markers.

## 90 Methods

### 91 Study populations, genotyping and inflammatory phenotype quantification

#### 92 *Northern Finland Birth Cohort 1966*

93 The Northern Finland Birth Cohort 1966 (NFBC1966) was initiated to study factors affecting preterm birth,  
94 low birth weight, and subsequent morbidity and mortality ([www oulu.fi/nfbc](http://www oulu.fi/nfbc)). It comprises 96% of all births  
95 during 1966 in the two northernmost provinces in Finland; altogether 12,058 children were live-born into  
96 the cohort, and the follow-ups occurred at the ages of 1, 14, 31, and 46 years (11, 12). The data analyzed in  
97 the present study is from the 31-years follow-up when clinical examinations and blood sampling was  
98 completed for altogether 6,033 individuals, 5,284 of whom had body mass index, inflammatory phenotypes  
99 and genotype data available (a maximum number of individuals per inflammatory marker 5,100). Genotyping  
100 of the samples was completed using 370k Illumina HumanHap arrays (Illumina Inc., CA, USA) and subsequent  
101 imputation was performed based on the 1000 Genome reference panel. A total of 16 inflammatory  
102 phenotypes were quantified from overnight fasting plasma samples using Bio-Rad's Bio-Plex 200 system (Bio-  
103 Rad Laboratories Inc., CA, USA) with Milliplex human chemokine/cytokine and CVD/cytokine kits (Cat#  
104 HCYTOMAG-60K-12 and Cat# SPR349; Millipore, St Charles, MO, USA) and Bio-Plex Manager Software version  
105 4.3 as previously described (13). The 16 inflammatory phenotypes studied in the NFBC1966 were interleukin  
106 (IL) 1-alpha (IL1 $\alpha$ ), IL1-beta (IL1 $\beta$ ), IL4, IL6, IL8, IL17, IL1 receptor antagonist (IL1ra), interferon gamma-  
107 induced protein 10 (IP10), monocyte chemoattractant protein 1 (MCP1), tumor necrosis factor alpha (TNF $\alpha$ ),  
108 vascular endothelial growth factor (VEGF), plasminogen activator inhibitor 1 (PAI-1), soluble CD40 ligand  
109 (sCD40L), soluble E-selectin (sE-selectin), soluble intercellular adhesion molecule 1 (sICAM-1) and soluble  
110 vascular cell adhesion molecule 1 (sVCAM-1).

#### 111 *GWAS summary statistics from three Finnish population cohorts*

112 Meta-analyses were conducted for 10 phenotypes available in a previous GWAS (8). The study included up  
113 to 8,293 Finnish individuals from The Cardiovascular Risk in Young Finns Study (YFS) (14) and FINRISK  
114 ([www.thl.fi/finriski](http://www.thl.fi/finriski)) (15) adding up to 13,577 individuals studied in the present meta-analyses. Shortly, YFS is

115 a population-based follow-up study started in 1980 comprising randomly chosen individuals from Finnish  
116 cities Helsinki, Kuopio, Tampere, Oulu, and Turku. The YFS data included in the previous GWAS is from 2,019  
117 individuals who participated in the follow-up in 2007 and who had both inflammatory phenotype and  
118 genotype data available. FINRISK is a Finnish population survey conducted every five years to monitor chronic  
119 diseases and their risk factors. The surveys use independent, random, and representative samples from  
120 different geographical areas of Finland. The data included in the present meta-analyses were from  
121 participants of the 1997 and 2002 surveys. Genotypes were obtained using 670k Illumina HumanHap arrays  
122 (Illumina Inc., CA, USA) and imputed based on 1000 Genome reference panel. Inflammatory markers were  
123 quantified using Bio-Rad's premixed Bio-Plex Pro Human Cytokine 27-plex Assay and 21-plex Assay, and Bio-  
124 Plex 200 reader with Bio-Plex 6.0 software (Bio-Rad Laboratories Inc., CA, USA) as previously described (16,  
125 17). Samples were serum in YFS, EDTA plasma in FINRISK1997, and heparin plasma in FINRISK2002.

## 126 Statistical analyses

### 127 *GWAS and meta-analysis*

128 To allow meta-analysis between the present results and the previous GWAS, the data processing and analysis  
129 model were done according to Ahola-Olli *et al.* (8): Preceding the analyses, linear regression models were  
130 fitted to adjust the inflammatory phenotypes for age, sex, BMI, and ten first genetic principal components to  
131 control for population stratification. The resulting residuals were normalized with inverse-rank based  
132 transformation, and the adjusted and transformed residuals were used as phenotypes in the analyses.  
133 Genome-wide association tests were performed using snptest\_v2.5.1 software (18, 19). Allele effects were  
134 estimated using an additive model (-frequentist 1) and the option to center and scale the phenotypes was  
135 disabled (-use\_raw\_phenotypes). The GWAS results were filtered by including markers with model fit info >  
136 0.8 and minor allele count > 10. Filtered data was used to perform meta-analyses by METAL software (v.2011-  
137 03-25) (20) for the 10 phenotypes (IL1 $\beta$ , IL1ra, IL17, IL4, IL6, IL8, IP10, MCP1, TNF $\alpha$ , and VEGF) available in  
138 the previous GWAS (8). Genomic control correction was enabled to account for population stratification and  
139 cryptic relatedness.

140 *Supplemental genome-wide tests in NFBC1966*

141 Individuals showing symptoms of an acute infection were omitted from the supplemental genome-wide tests  
142 performed in the NFBC1966 population. Here, individuals reported having fever at the time of the blood  
143 sampling and individuals having C-reactive protein (CRP) level > 10 mg/l were excluded. Otherwise the  
144 analysis models were as above.

145 *Conditional analyses and variance explained*

146 To assess whether the identified loci harbor multiple independent association signals, we conducted  
147 conditional analyses by further adjusting the models with the locus-specific lead variants. The association  
148 tests were repeated within a 2Mb window around the lead SNP for the phenotypes studied in the NFBC1966  
149 population only. For the meta-analyzed phenotypes, we applied a method proposed by Yang *et al.* that  
150 enables conditional analyses of GWAS summary statistics (21, 22). NFBC1966 was used as a reference sample  
151 to estimate linkage disequilibrium (LD) corrections in these analyses. The proportion of variance explained  
152 was calculated using all independent variants using the following formula:

153 
$$\text{Variance explained} = (\beta \times \sqrt{2 \times \text{MAF}(1 - \text{MAF})})^2$$

154 Here  $\beta$  is the variant's effect estimate on the inflammatory phenotype and MAF denotes minor allele  
155 frequency.

156 *Complementary association tests on soluble adhesion molecule levels*

157 Complementary association tests within a 2Mb window were conducted to better evaluate the effect of the  
158 ABO blood type on the association with soluble adhesion molecule levels at the ABO locus. For sE-selectin,  
159 sICAM-1 and sVCAM-1 levels, linear models were fitted by further adjusting for the ABO blood type or  
160 rs507666 genotype tagging the A1 subtype (23).

161 In addition, we determined the effect estimates of ABO blood types and ABO blood types stratified by  
162 rs507666 genotype on sE-selectin, sICAM-1 and sVCAM-1 levels in linear models. Here, adjusted and  
163 transformed soluble adhesion molecule concentrations were as outcomes and ABO blood types as

164 categorical variables (blood type A versus non-A, etc.); corresponding models were fitted for the stratified  
165 blood types (blood type A with rs507666 G/G versus others, etc.)

### 166 *Correlations of the genetic effects*

167 As previous evidence suggests that the elevated concentrations of circulating markers of inflammation  
168 increase the risk of cardiovascular diseases (CVD) (24, 25), we further evaluated how variants at the loci  
169 associating with inflammatory phenotypes may relate to other cardiovascular traits. We extracted SNP  
170 effects on coronary artery disease (CAD) risk, stroke risk, and low-density lipoprotein cholesterol (LDL-C) or  
171 high-density lipoprotein cholesterol (HDL-C) levels from open-access data provided by CARDIoGRAM (26),  
172 Stroke Consortia (27), and a metabolomics GWAS (28). First, data were filtered to include only the SNPs  
173 available in all the three data sets within a 1Mb window around each lead variant. Next, subsets of  
174 representative SNPs at the each of the significant loci were extracted using clumping function in PLINK  
175 1.90b4.1 (29). Here, NFBC1966 was used as the reference sample to construct LD structures and  $r^2=0.2$  was  
176 used as the LD threshold while other parameters were as by default. The subsets of SNPs were used to  
177 determine the linear relationships of the genetic effects (Z-scores) on inflammatory phenotypes versus other  
178 traits for each significant loci identified in the present GWAS.

## 179 **Results**

180 Basic characteristics of the NFBC1966 study population is provided in Table 1. Inflammatory phenotype  
181 distributions are tabulated in Table S1 and their correlation structure is shown in Figure S1. Using a threshold  
182 of  $p < 3.1 \times 10^{-9}$  for statistical significance (standard genome-wide significance level  $p < 5 \times 10^{-8}$  corrected for 16  
183 phenotypes tested), we identified seven novel and six previously reported loci associating with one or more  
184 of the inflammatory phenotypes. The results are summarized in Table 1 and combined Manhattan plots are  
185 shown in Figure 1. Manhattan plots and Q-Q plots for each inflammatory phenotype are provided in the  
186 supplement (Figure S2 A-Z). Genomic inflation factor values range between 0.99-1.02 suggesting no inflation  
187 in the test statistics (Table S2). Table S3 lists traits associated previously with the loci showing novel  
188 associations with inflammatory phenotypes in the present study.



189

190 Cell adhesion molecules

191 *The ABO locus shows large effects on sE-selectin, sICAM-1, and sVCAM-1 levels*

192 We observed a novel effect on sVCAM-1 concentration in 9q34.2 near *ABO* (*ABO*, alpha 1-3-N-  
193 acetylgalactosaminyltransferase and alpha 1-3-galactosyltransferase) in the NFBC1966 population. This locus  
194 showed a robust association also with sE-selectin and sICAM-1 concentrations as previously reported (23, 30,  
195 31). Noteworthy, the lead variant for sE-selectin and sICAM-1 associations (rs2519093) was different from  
196 the lead variant for sVCAM-1 association (rs8176746). The former variant is in LD ( $r^2=1$  in NFBC1966) with  
197 rs507666 tagging the *ABO* blood type A subtype A1 whereas the latter variant tags the blood type B (23).

198 To better evaluate if the *ABO* blood types constitute the molecular mechanism explaining the association  
199 between the *ABO* locus and soluble adhesion molecule levels, we completed supplementary association tests  
200 further adjusted for *ABO* blood type or rs507666 genotype indicative of the A1 subtype. The results of the  
201 supplementary tests suggested that the association of the rs8176746 with sVCAM-1 concentration is  
202 independent of the A1 subtype ( $p=4.98 \times 10^{-15}$  for the rs507666-adjusted association). On the contrary, the  
203 associations of the rs2519093 with concentrations of sE-selectin and sVCAM-1 remained highly significant  
204 when adjusted for *ABO* blood type ( $p=3.40 \times 10^{-123}$  and  $p=3.43 \times 10^{-17}$ , respectively). Statistical significances  
205 were abolished when rs8176746 association with sVCAM-1 was adjusted for *ABO* blood type and rs2519093  
206 association with sE-selectin or sICAM-1 was adjusted for rs507666.

207 We further determined the effect estimates of the *ABO* blood types and *ABO* blood types stratified by  
208 rs507666 genotype on soluble adhesion molecule levels. The blood type A showed negative associations with  
209 the levels of all the three adhesion molecules and the effect was the most robust on the sE-selectin level  
210 (Figure 2, Panel 1). However, major discrepancies in the effect directions were seen when the analyses were  
211 stratified by the rs507666 genotype (Figure 2, Panel 2). Congruent with previous reports (23, 30), the present  
212 results suggest that the A1 subtype/rs507666 genotype influences sE-selectin or sVCAM-1 levels. In contrast,

213 the blood type B seems to attribute predominantly to sVCAM-1 level while the A1 subtype/rs507666 shows  
214 only a modest effect on sVCAM-1.

215 *HSP90B1 and ABCA8 loci associate with sVCAM-1 levels*

216 We identified two other novel loci for sVCAM-1 (12q23.3 and 17q24.2) in the NFBC1966 population. In chr12  
217 the lead variant rs117238625 is in LD ( $r^2=1$  in NFBC1966) with rs117468318 locating in the 5' UTR region of  
218 *HSP90B1* (heat shock protein 90kDa beta member 1) and, according to RegulomeDB (32), is likely to affect  
219 transcription factor binding providing evidence for a possible regulatory mechanism. Variants in this locus  
220 have been previously associated with stem cell growth factor beta levels (8) and corneal structure (33). The  
221 association signal in chr17 locates near *ABCA8* (ATP binding cassette subfamily A member 8) encoding one  
222 of the ATP binding cassette transporters. Other studies have identified associations in this locus with HDL  
223 and LDL cholesterol levels (34–37), breast cancer risk (38), heart's electrical cycle related traits (QT interval,  
224 QRS duration) (39–41).

225 *Variations in sialyltransferase encoding genes show an effect on sE-selectin level*

226 For sE-selectin level, we identified a novel association in 11q24.2 in the region of *ST3GAL4* (ST3 beta-  
227 galactoside alpha-2,3-sialyltransferase 4). Other studies have associated other variants in this region with  
228 mean platelet volume and platelet count (42), LDL cholesterol levels (34, 36) or pleiotropic associations with  
229 LDL cholesterol and C-reactive protein (43), blood protein levels (44) and liver enzyme levels (45). We  
230 identified a suggestive signal with sE-selectin level also in 3q12.1 near *ST3GAL6* (ST3 beta-galactoside alpha-  
231 2,3-sialyltransferase 6), but the association was not significant after multiple correction ( $p=1.75 \times 10^{-08}$ ). Both  
232 of the sialyltransferase genes have been implicated in the production of functional E-, P-, and L-selectin  
233 ligands in mice (46).

234 *Two independent association signals on sICAM-1 level near ICAM1*

235 We replicated the previously reported association for sICAM-1 level in 19p13.2 near *ICAM1* (intracellular  
236 adhesion molecule 1) (23, 44). When the primary association test was conditioned for the lead variant

237 rs117960796, another significant association was detected (rs74428614,  $p=1.14 \times 10^{-16}$ ) indicative of more  
238 than one independent variant contributing to sICAM-1 level in this locus.

### 239 Vascular endothelial growth factor

240 In the meta-analyses, we identified a novel locus 4p16.2 with a large effect on VEGF ( $\beta=-2.38$  SD). This locus  
241 harbours genes *EVC* (EvC ciliary complex subunit 1), *EVC2* (EvC ciliary complex subunit 2), and *STK32B*  
242 (serine/threonine kinase 32B). Mutations in this locus have been associated previously with Celiac disease  
243 (47), coronary heart disease (48), essential tremor (49), and Ellis van Creveld syndrome (50, 51). In addition,  
244 we replicated two previously reported loci associating with VEGF levels in 6p21.1 near *VEGFA* (vascular  
245 endothelial growth factor A) and in 9p24.2 near *VLDLR* (very-low-density lipoprotein receptor) (8).

### 246 Pro-inflammatory cytokines

#### 247 *Locus near DLEU1 shows a large effect on TNF $\alpha$*

248 We identified a novel variant with a large effect on TNF $\alpha$  levels ( $\beta=2.13$  SD) in 13q14.3 near *DLEU1* and *DLEU7*  
249 (deleted in lymphocytic leukemia 1 and 7) in the meta-analyses. Previous GWAS findings in this locus include  
250 associations with reticulocyte related traits (42) and tooth development (52).

#### 251 *The HLA locus shows a small effect on IL-1 $\beta$*

252 A novel variant at 6p22.1 in the human leukocyte antigen locus associating with IL-1 $\beta$  level was identified in  
253 the meta-analyses. In the conditional analyses, we observed two independent association signals at this locus  
254 (Table 1, Figure S2 J). The same locus and the same lead variant rs6917603 showed also a suggestive effect  
255 on IL4 level (Figure S2 L), but the meta-analysed result was not significant after multiple correction  
256 ( $p=5.56 \times 10^{-09}$ ). Variants in this region have been associated previously with multiple immune system related  
257 traits such as white blood cell count (42), but also with several other traits, including lipid metabolism  
258 phenotypes (53), schizophrenia (54) and lung cancer (55).

## 259 Chemokines

260 We replicated previously reported loci near *CXCL10* (C-X-C motif chemokine ligand 10) and *ACKR1* (atypical  
261 chemokine receptor 1) associating with IP10 levels and with MCP1 levels, respectively (8).

## 262 Supplemental genome-wide tests in NFBC1966

263 Altogether 236 individuals having fever or CRP>10 mg/l were excluded from the supplemental genome-wide  
264 tests performed in the NFBC1966 population. The results of the supplementary analyses were congruent  
265 with the original findings (Table S4).

## 266 Comparisons of SNP effects on inflammatory markers versus other traits

267 Elevated circulating concentrations of inflammatory markers is a risk factor for cardiovascular diseases (24,  
268 25). In order to add insights how genetic variants associating with inflammatory phenotypes contribute to  
269 other cardiovascular health-related traits, we compared the SNP effects (Z-scores) at each significant locus  
270 versus corresponding SNP effects obtained from open-access data (26–28). The list of SNPs used to  
271 determine the correlations of the SNP effects on inflammatory phenotypes versus other traits is provided in  
272 Table S5. At the *ABO* locus, we observed a negative linear relationship between the SNP effects on sE-selectin  
273 and sICAM-1 levels and CAD risk, stroke risk as well as LDL-C and HDL-C levels (Figure 3A-B, Figure S3 A-B).  
274 For sVCAM-1 at the same locus, the overall trend was similar, but correlations did not reach statistical  
275 significance due to a low number of representative SNPs obtained in clumping (Figure 3C, Figure S3 C). The  
276 results at the other loci are provided in Figures S3 D-I.

## 277 Discussion

278 The present study examines genetic determinants of 16 circulating inflammatory phenotypes in 5,284  
279 individuals from Northern Finland with a subsequent meta-analysis of 10 phenotypes in three other Finnish  
280 populations adding up to a total of 13,577 participants. We report seven novel and replication of six  
281 previously published genetic associations.

282 We detected a novel association for sVCAM-1 concentration at the *ABO* locus. This locus showed robust  
283 associations also with sE-selectin and sICAM-1 concentrations congruent with previous studies (23, 30, 31).  
284 The present GWAS findings suggested two distinct association signals at the *ABO* locus for the sE-selectin and  
285 sICAM-1 levels versus sVCAM-1 level. The results of the supplementary tests supported the perception that  
286 genetic variants in this locus may regulate the circulating concentration of adhesion molecules by at least  
287 two different mechanisms. The first mechanism comprises the blood type A subtype A1, tagged by  
288 rs507666-A, that has a robust lowering effect on sE-selectin and sICAM-1 levels (23, 30). The second  
289 mechanism involves the blood type B that seems to have an increasing effect on sVCAM-1 level. Others have  
290 suggested that the lowering effect of the A1 subtype on sE-selectin and sICAM-1 could arise from increased  
291 glycosyltransferase activity that possibly modifies the shedding of the adhesion molecules from the  
292 endothelium and/or their clearance rate from circulation (23, 30, 56). To the best of our knowledge, the  
293 underlying mechanism explaining the association between the blood type B and the higher sVCAM-1  
294 concentration remains unknown and warrants research. VCAM-1-mediated adhesion involves interaction  
295 with galectin-3, a protein that has a specificity for galactosides (57, 58). As the B antigen holds an additional  
296 galactose monomer compared with the A and O antigens, and galectins are known to recognize blood type  
297 antigens (59), it raises the speculation that the amount of unbound sVCAM-1 in the circulation could be  
298 influenced by a possible competitive binding of galectin-3 with sVCAM-1 and the B antigen.

299 To evaluate how variants in the *ABO* locus may relate to other health outcomes, we compared the  
300 correspondence of genetic effects on soluble adhesion molecule levels versus cardiovascular health-related  
301 traits. We observed that the genetic effects on adhesion molecule levels were inclined to show a negative  
302 correlation with the genetic effects on LDL-C and HDL-C levels as well as lower risk for CAD and stroke. This  
303 denotes that the genotypes at the *ABO* locus associating with increased levels of soluble adhesion molecules  
304 tended to associate with lower circulating cholesterol level as well as lower risk of cardiovascular outcomes.  
305 This was unexpected since according to previous evidence increased soluble adhesion molecule levels are  
306 linked with atherosclerosis progression and vascular outcomes (25, 60, 61). Possible explanations unravelling  
307 the negative correlation advocate that soluble adhesion molecules may compete with leukocyte adhesion to

308 the endothelial molecules or that enhanced ectodomain shedding may contribute to the reduced  
309 recruitment of leukocytes to the subendothelial space thereby promoting cardioprotective effects (62).  
310 Additionally, the observed negative relationship between the genetic effects on soluble adhesion molecule  
311 and LDL-C levels suggests that altered cholesterol metabolism could contribute to the CAD risk associated  
312 with the *ABO* locus; the genetic effects of the same SNPs on LDL-C versus CAD risk showed a positive  
313 correlation (Figure 3). Nevertheless, further studies are warranted to understand the exact mechanisms.

314 Another novel association with sVCAM-1 level was detected in chr12 near *HSP90B1* encoding heat shock  
315 protein gp96, a chaperone that is essential for assembly of 14 of 17 integrin pairs in the hematopoietic system  
316 (63). Integrin  $\alpha4\beta1$ , also known as very late antigen (VLA)-4, is an important ligand of VCAM-1 (64). The lead  
317 SNP of this locus is in LD with rs117468318 ( $r^2=1$  in NFBC1966) that locates in the 5'UTR region of *HSP90B1*  
318 and, according to RegulomeDB (32), is likely to affect transcription factor binding suggesting a possible  
319 regulatory mechanism for the detected association. If altered transcription of *HSP90B1* had a downstream  
320 effect on integrin  $\alpha4\beta1$  level, this could further modify the level of unbound sVCAM-1 in circulation.

321 The 3<sup>rd</sup> novel locus showing association with sVCAM-1 level was identified in chr17 near *ABCA8*. The lead SNP  
322 rs112001035 is an eQTL for *ABCA8* in multiple tissue types (65). *ABCA8* has been shown to regulate levels of  
323 HDL-cholesterol with a mechanism that likely involves interaction with *ABCA1* (66). If *ABCA8* is involved in  
324 regulation of HDL level (66) and if plasma HDL levels contribute to VCAM-1 expression (67, 68), then altered  
325 expression of the *ABCA8* could influence circulating levels of sVCAM-1 via modulating HDL particle  
326 concentration. However, this hypothesis is not supported by the fact that the effect of the lead SNP on HDL  
327 particle concentration is negligible in a large metabolomics GWAS ( $\beta=-0.043$  SD,  $p=0.049$ ) (28). There is  
328 evidence suggesting that *ABCA8* may be involved in sphingolipid metabolism (69) and it has been  
329 hypothesized that *ABCA8* may be involved in the formation of specific membrane domains during ApoA-I  
330 lipidation (66). Thus, one could speculate that the association between the *ABCA8* locus and sVCAM-1 level  
331 could be related to altered HDL composition rather than absolute particle concentration, which could  
332 contribute to altered endothelial homeostasis. However, more evidence is needed to draw conclusions.

333 We detected a novel effect of rs11220471 in chr11 near *ST3GAL4* on sE-selectin levels in the NFBC1966  
334 population. *ST3GAL4* encodes a member of the glycosyltransferase 29 family of enzymes involved in protein  
335 glycosylation. In mice, St3Gal4 is needed for synthesis of functional selectin ligands (46) and it has been  
336 shown to participate to chemokine C-C motif ligand 5 (Ccl5)-dependent myeloid cell recruitment to inflamed  
337 endothelium (70). The altered levels or structure of selectin ligands due to variation in *ST3GAL4* could  
338 contribute to the levels of unbound sE-selectin in circulation, providing a biologically rational mechanism for  
339 the detected association.

340 In the meta-analyses, we detected a novel large effect locus for VEGF in chr4 ( $\beta=-2.38$  SD) near genes *EVC*  
341 (*EvC* ciliary complex subunit 1), *EVC2* (*EvC* ciliary complex subunit 2) and *STK32B* (serine/threonine kinase  
342 32B). Mutations in this locus have been associated previously with celiac disease (47), coronary artery disease  
343 (48), and Ellis-van Creveld syndrome, a rare recessive disorder characterized with congenital defects such as  
344 short ribs, postaxial polydactyly, growth retardation, and ectodermal and cardiac defects (50, 51). The  
345 expression level of *STK32B* has been associated with clinicopathological features of oral cavity cell carcinoma  
346 including peritumoral inflammatory infiltration, metastatic spread to the cervical lymph nodes, and tumour  
347 size (71). *STK32B* may play a role in the hedgehog signalling pathway, which has been implicated in metastasis  
348 and angiogenesis in cancer (71) and downregulated in celiac disease (72). The hedgehog signalling has shown  
349 to be involved in the regulation of VEGF expression during developmental angiogenesis in avian embryo (73).  
350 Thus, previous literature and our results advocate that *STK32B* may be involved in the regulation of VEGF  
351 levels possibly via hedgehog signalling-related mechanism.

352 The other novel findings obtained in meta-analysis include a large effect locus on  $\text{TNF}\alpha$  level in chr13 ( $\beta=2.13$   
353 SD). The locus in 13q14.3 associating with  $\text{TNF}\alpha$  locates near *DLEU1* and *DLEU7* (Deleted in Lymphocytic  
354 Leukemia 1 and 7). This region is recurrently deleted in tumours and hematopoietic malignancies (74, 75).  
355 *DLEU1* is a part of a transcriptionally coregulated gene cluster that modulates the activity of the NF-kB  
356 pathway (76) which is also modulated by  $\text{TNF}\alpha$  (77). It is largely unknown how the *DLEU1* and related *DLEU2*  
357 regulate NF-kB activity (78); our result suggests that  $\text{TNF}\alpha$  signalling might be involved in this mechanism.

358 At last, we identified a small effect locus in chr6 harbouring two independent association signals on IL-1 $\beta$  and  
359 showing suggestive association also on IL4 level. This association signal is in the region coding the human  
360 leukocyte antigen proteins, and further experimental evidence would be needed to identify the exact  
361 mechanism how the locus contributes to interleukin levels.

362 The strengths and limitations of our study should be considered. The sample size of the present study should  
363 provide adequate power for detecting genetic associations with circulating markers of systemic inflammation  
364 (9). The use of genetically isolated populations, such as inhabitants of Northern Finland, should further  
365 enhance the power for locus identification in GWAS settings (79). We were able to perform meta-analyses  
366 only for 10 out of the 16 inflammatory phenotypes analysed in the NFBC1966 population and, thus, a  
367 replication of the present findings in other populations would be helpful. The inter-assay coefficient of  
368 variability measures for sE-selectin and VEGF in particular are notably larger than 15% that is considered to  
369 be the limit for acceptable values (Table S1). However, to our consideration, all the findings identified in the  
370 present study locate on genome regions with biologically relevant genes. Furthermore, the extremely small  
371 p-values ( $p=4.48 \times 10^{-305}$  for sE-selectin at the *ABO* locus and  $p=4.95 \times 10^{-96}$  for VEGF at the *VEGFA* locus) and the  
372 replications of the previously reported loci speak for the data adequacy and adds confidence to the novel  
373 associations. Due to mismatches in genotype availability between the present results and open-access data  
374 sets or low number of SNPs obtained after exclusions, it was not possible to carry out meaningful  
375 comparisons of the genetic effects at all the significant loci.

376 The present results provide novel information on genetic mechanisms influencing levels of inflammatory  
377 phenotypes in circulation. The evident role of the *ABO* locus in the regulation of the soluble adhesion  
378 molecule levels in circulation likely encompasses at least two distinct mechanisms influencing sE-selectin,  
379 sICAM-1 and sVCAM-1 levels. Our findings provide evidence that increased soluble adhesion molecule  
380 concentrations per se may not be a risk factor for cardiovascular outcomes. In particular, genetic variation  
381 associating with increased sE-selectin or sICAM-1 levels at the *ABO* locus seem to contribute to lower CAD  
382 risk. Furthermore, genetic effects at the *ICAM1* locus providing a direct molecular link to sICAM-1



383 concentration do not correlate with the genetic effects on CAD risk nor stroke risk. Overall, the present study  
384 extends the knowledge about the precise molecular pathways involved in inflammatory load.

## 385 References

- 386 1. Donath,M.Y. (2014) Targeting inflammation in the treatment of type 2 diabetes: time to start. *Nat. Rev.*  
387 *Drug Discov.*, **13**, 465–476.
- 388 2. Heneka,M.T., Kummer,M.P. and Latz,E. (2014) Innate immune activation in neurodegenerative disease. *Nat.*  
389 *Rev. Immunol.*, 10.1038/nri3705.
- 390 3. Coussens,L.M. and Werb,Z. (2002) Inflammation and cancer. *Nature*, 10.1038/nature01322.Inflammation.
- 391 4. Goldberg,E.L. and Dixit,V.D. (2015) Drivers of age-related inflammation and strategies for healthspan  
392 extension. *Immunol. Rev.*, 10.1111/imr.12295.
- 393 5. World Health Organization (2015) World report on ageing and health.
- 394 6. de Craen,A.J.M., Posthuma,D., Remarque,E.J., van den Biggelaar,A.H.J., Westendorp,R.G.J. and  
395 Boomsma,D.I. (2005) Heritability estimates of innate immunity: An extended twin study. *Genes Immun.*,  
396 10.1038/sj.gene.6364162.
- 397 7. Medzhitov,R. (2008) Origin and physiological roles of inflammation. *Nature*, 10.1038/nature07201.
- 398 8. Ahola-Olli,A. V., Würtz,P., Havulinna,A.S., Aalto,K., Pitkänen,N., Lehtimäki,T., Kähönen,M., Lyytikäinen,L.P.,  
399 Raitoharju,E., Seppälä,I., *et al.* (2017) Genome-wide Association Study Identifies 27 Loci Influencing  
400 Concentrations of Circulating Cytokines and Growth Factors. *Am. J. Hum. Genet.*,  
401 10.1016/j.ajhg.2016.11.007.
- 402 9. Sun,B.B., Maranville,J.C., Peters,J.E., Stacey,D., Staley,J.R., Blackshaw,J., Burgess,S., Jiang,T., Paige,E.,  
403 Surendran,P., *et al.* (2018) Genomic atlas of the human plasma proteome. *Nature*, 10.1038/s41586-018-  
404 0175-2.
- 405 10. Ligthart,S., Vaez,A., Vösa,U., Stathopoulou,M.G., de Vries,P.S., Prins,B.P., Van der Most,P.J., Tanaka,T.,  
406 Naderi,E., Rose,L.M., *et al.* (2018) Genome Analyses of 200,000 Individuals Identify 58 Loci for Chronic  
407 Inflammation and Highlight Pathways that Link Inflammation and Complex Disorders. *Am. J. Hum. Genet.*,  
408 **103**, 691–706.
- 409 11. Sabatti,C., Service,S.K., Hartikainen,A.-L., Pouta,A., Ripatti,S., Brodsky,J., Jones,C.G., Zaitlen,N.A., Varilo,T.,  
410 Kaakinen,M., *et al.* (2009) Genome-wide association analysis of metabolic traits in a birth cohort from a  
411 founder population. *Nat. Genet.*, 10.1038/ng.271.
- 412 12. Järvelin,M.R., Sovio,U., King,V., Lauren,L., Xu,B., McCarthy,M.I., Hartikainen,A.L., Laitinen,J., Zitting,P.,  
413 Rantakallio,P., *et al.* (2004) Early life factors and blood pressure at age 31 years in the 1966 Northern  
414 Finland birth cohort. *Hypertension*, 10.1161/01.HYP.0000148304.33869.ee.
- 415 13. Saukkonen,T., Mutt,S.J., Jokelainen,J., Saukkonen,A.M., Raza,G.S., Karhu,T., Härkönen,P., Eckel,J.,  
416 Herzig,K.H., Rajala,U., *et al.* (2018) Adipokines and inflammatory markers in elderly subjects with high  
417 risk of type 2 diabetes and cardiovascular disease. *Sci. Rep.*, **8**, 1–8.
- 418 14. Raitakari,O.T., Juonala,M., Rönnemaa,T., Keltikangas-Järvinen,L., Räsänen,L., Pietikäinen,M., Hutri-  
419 Kähönen,N., Taittonen,L., Jokinen,E., Marniemi,J., *et al.* (2008) Cohort profile: The cardiovascular risk in  
420 young Finns study. *Int. J. Epidemiol.*, 10.1093/ije/dym225.
- 421 15. Borodulin,K., Tolonen,H., Jousilahti,P., Jula,A., Juolevi,A., Koskinen,S., Kuulasmaa,K., Laatikainen,T.,  
422 Männistö,S., Peltonen,M., *et al.* (2017) Cohort Profile: The National FINRISK Study. *Int. J. Epidemiol.*,  
423 10.1093/ije/dyx239.
- 424 16. Santalahti,K., Maksimow,M., Airola,A., Pahikkala,T., Hutri-Kähönen,N., Jalkanen,S., Raitakari,O.T. and  
425 Salmi,M. (2016) Circulating cytokines predict the development of insulin resistance in a prospective  
426 Finnish population cohort. *J. Clin. Endocrinol. Metab.*, 10.1210/jc.2016-2081.
- 427 17. Santalahti,K., Havulinna,A., Maksimow,M., Zeller,T., Blankenberg,S., Vehtari,A., Joensuu,H., Jalkanen,S.,  
428 Salomaa,V. and Salmi,M. (2017) Plasma levels of hepatocyte growth factor and placental growth factor  
429 predict mortality in a general population: a prospective cohort study. *J. Intern. Med.*,  
430 10.1111/joim.12648.
- 431 18. Marchini,J., Howie,B., Myers,S., McVean,G. and Donnelly,P. (2007) A new multipoint method for genome-  
432 wide association studies by imputation of genotypes. *Nat. Genet.*, 10.1038/ng2088.

- 433 19. Marchini, J. and Howie, B. (2010) Genotype imputation for genome-wide association studies. *Nat. Rev.*  
434 *Genet.*, 10.1038/nrg2796.
- 435 20. Willer, C.J., Li, Y. and Abecasis, G.R. (2010) METAL: Fast and efficient meta-analysis of genomewide  
436 association scans. *Bioinformatics*, 10.1093/bioinformatics/btq340.
- 437 21. Yang, J., Ferreira, T., Morris, A.P., Medland, S.E., Madden, P.A.F., Heath, A.C., Martin, N.G., Montgomery, G.W.,  
438 Weedon, M.N., Loos, R.J., *et al.* (2012) Conditional and joint multiple-SNP analysis of GWAS summary  
439 statistics identifies additional variants influencing complex traits. *Nat. Genet.*, 10.1038/ng.2213.
- 440 22. Yang, J., Lee, S.H., Goddard, M.E. and Visscher, P.M. (2011) GCTA: A tool for genome-wide complex trait  
441 analysis. *Am. J. Hum. Genet.*, 10.1016/j.ajhg.2010.11.011.
- 442 23. Paré, G., Chasman, D.I., Kellogg, M., Zee, R.Y.L., Rifai, N., Badola, S., Miletich, J.P. and Ridker, P.M. (2008) Novel  
443 association of ABO histo-blood group antigen with soluble ICAM-1: Results of a genome-wide association  
444 study of 6,578 women. *PLoS Genet.*, 10.1371/journal.pgen.1000118.
- 445 24. Ridker, Hennekens, Buring and Rifai (2000) C-reactive protein and other markers of inflammation in the  
446 prediction of cardiovascular disease in women. *Ital. Heart J. Suppl.*, 1, 1066–7.
- 447 25. Hwang, S.J., Ballantyne, C.M., Sharrett, A.R., Smith, L.C., Davis, C.E., Gotto, A.M. and Boerwinkle, E. (1997)  
448 Circulating adhesion molecules VCAM-1, ICAM-1, and E-selectin in carotid atherosclerosis and incident  
449 coronary heart disease cases: the Atherosclerosis Risk In Communities (ARIC) study. *Circulation*,  
450 10.1161/01.cir.96.12.4219.
- 451 26. Nikpay, M., Goel, A., Won, H.H., Hall, L.M., Willenborg, C., Kanoni, S., Saleheen, D., Kyriakou, T., Nelson, C.P.,  
452 CHopewell, J., *et al.* (2015) A comprehensive 1000 Genomes-based genome-wide association meta-  
453 analysis of coronary artery disease. *Nat. Genet.*, 10.1038/ng.3396.
- 454 27. Traylor, M., Farrall, M., Holliday, E.G., Sudlow, C., Hopewell, J.C., Cheng, Y.C., Fornage, M., Ikram, M.A.,  
455 Malik, R., Bevan, S., *et al.* (2012) Genetic risk factors for ischaemic stroke and its subtypes (the  
456 METASTROKE Collaboration): A meta-analysis of genome-wide association studies. *Lancet Neurol.*,  
457 10.1016/S1474-4422(12)70234-X.
- 458 28. Kettunen, J., Demirkan, A., Würtz, P., Draisma, H.H.M., Haller, T., Rawal, R., Vaarhorst, A., Kangas, A.J.,  
459 Lyytikäinen, L.P., Pirinen, M., *et al.* (2016) Genome-wide study for circulating metabolites identifies 62 loci  
460 and reveals novel systemic effects of LPA. *Nat. Commun.*, 10.1038/ncomms11122.
- 461 29. Purcell, S., Neale, B., Todd-Brown, K., Thomas, L., Ferreira, M.A.R., Bender, D., Maller, J., Sklar, P., de  
462 Bakker, P.I.W., Daly, M.J., *et al.* (2007) PLINK: A Tool Set for Whole-Genome Association and Population-  
463 Based Linkage Analyses. *Am. J. Hum. Genet.*, 10.1086/519795.
- 464 30. Karakas, M., Baumert, J., Kleber, M.E., Thorand, B., Dallmeier, D., Silbernagel, G., Grammer, T.B.,  
465 Rottbauer, W., Meisinger, C., Illig, T., *et al.* (2012) A Variant In the Abo Gene Explains the Variation in  
466 Soluble E-Selectin Levels-Results from Dense Genotyping in Two Independent Populations. *PLoS One*,  
467 10.1371/journal.pone.0051441.
- 468 31. Paterson, A.D., Lopes-Virella, M.F., Waggott, D., Bricht, A.P., Hosseini, S.M., Carter, R.E., Shen, E., Mirea, L.,  
469 Bharaj, B., Sun, L., *et al.* (2009) Genome-wide association identifies the ABO blood group as a major locus  
470 associated with serum levels of soluble E-selectin. *Arterioscler. Thromb. Vasc. Biol.*,  
471 10.1161/ATVBAHA.109.192971.
- 472 32. Boyle, A.P., Hong, E.L., Hariharan, M., Cheng, Y., Schaub, M.A., Kasowski, M., Karczewski, K.J., Park, J., Hitz, B.C.,  
473 Weng, S., *et al.* (2012) Annotation of functional variation in personal genomes using RegulomeDB.  
474 *Genome Res.*, 10.1101/gr.137323.112.
- 475 33. Lu, Y., Vitart, V., Burdon, K.P., Khor, C.C., Bykhovskaya, Y., Mirshahi, A., Hewitt, A.W., Koehn, D., Hysi, P.G.,  
476 Ramdas, W.D., *et al.* (2013) Genome-wide association analyses identify multiple loci associated with  
477 central corneal thickness and keratoconus. *Nat. Genet.*, 10.1038/ng.2506.
- 478 34. Global Lipids Genetics Consortium, Willer, C.J., Schmidt, E.M., Sengupta, S., Peloso, G.M., Gustafsson, S.,  
479 Kanoni, S., Ganna, A., Chen, J., Buchkovich, M.L., *et al.* (2013) Discovery and refinement of loci associated  
480 with lipid levels. *Nat. Genet.*, 10.1038/ng.2797.
- 481 35. Surakka, I., Horikoshi, M., Mägi, R., Sarin, A.P., Mahajan, A., Lagou, V., Marullo, L., Ferreira, T., Miraglio, B.,  
482 Timonen, S., *et al.* (2015) The impact of low-frequency and rare variants on lipid levels. *Nat. Genet.*,

- 483 10.1038/ng.3300.
- 484 36. Spracklen,C.N., Chen,P., Kim,Y.J., Wang,X., Cai,H., Li,S., Long,J., Wu,Y., Wang,Y.X., Takeuchi,F., *et al.* (2017)
- 485 Association analyses of East Asian individuals and trans-ancestry analyses with European individuals
- 486 reveal new loci associated with cholesterol and triglyceride levels. *Hum. Mol. Genet.*,
- 487 10.1093/hmg/ddx062.
- 488 37. Teslovich,T.M., Musunuru,K., Smith,A. V., Edmondson,A.C., Stylianou,I.M., Koseki,M., Pirruccello,J.P.,
- 489 Ripatti,S., Chasman,D.I., Willer,C.J., *et al.* (2010) Biological, clinical and population relevance of 95 loci for
- 490 blood lipids. *Nature*, 10.1038/nature09270.
- 491 38. Michailidou,K., Lindström,S., Dennis,J., Beesley,J., Hui,S., Kar,S., Lemaçon,A., Soucy,P., Glubb,D.,
- 492 Rostamianfar,A., *et al.* (2017) Association analysis identifies 65 new breast cancer risk loci. *Nature*,
- 493 10.1038/nature24284.
- 494 39. Arking,D.E., Pulit,S.L., Crotti,L., Van Der Harst,P., Munroe,P.B., Koopmann,T.T., Sotoodehnia,N., Rossin,E.J.,
- 495 Morley,M., Wang,X., *et al.* (2014) Genetic association study of QT interval highlights role for calcium
- 496 signaling pathways in myocardial repolarization. *Nat. Genet.*, 10.1038/ng.3014.
- 497 40. van der Harst,P., van Setten,J., Verweij,N., Vogler,G., Franke,L., Maurano,M.T., Wang,X., Mateo Leach,I.,
- 498 Eijgelsheim,M., Sotoodehnia,N., *et al.* (2016) 52 Genetic Loci Influencing Myocardial Mass. *J. Am. Coll.*
- 499 *Cardiol.*, 10.1016/j.jacc.2016.07.729.
- 500 41. Evans,D.S., Avery,C.L., Nalls,M.A., Li,G., Barnard,J., Smith,E.N., Tanaka,T., Butler,A.M., Buxbaum,S.G.,
- 501 Alonso,A., *et al.* (2016) Fine-mapping, novel loci identification, and SNP association transferability in a
- 502 genome-wide association study of QRS duration in African Americans. *Hum. Mol. Genet.*,
- 503 10.1093/hmg/ddw284.
- 504 42. Astle,W.J., Elding,H., Jiang,T., Allen,D., Ruklisa,D., Mann,A.L., Mead,D., Bouman,H., Riveros-Mckay,F.,
- 505 Kostadima,M.A., *et al.* (2016) The Allelic Landscape of Human Blood Cell Trait Variation and Links to
- 506 Common Complex Disease. *Cell*, 10.1016/j.cell.2016.10.042.
- 507 43. Ligthart,S., Vaez,A., Hsu,Y.H., Stolk,R., Uitterlinden,A.G., Hofman,A., Alizadeh,B.Z., Franco,O.H. and
- 508 Dehghan,A. (2016) Bivariate genome-wide association study identifies novel pleiotropic loci for lipids and
- 509 inflammation. *BMC Genomics*, 10.1186/s12864-016-2712-4.
- 510 44. Suhre,K., Arnold,M., Bhagwat,A.M., Cotton,R.J., Engelke,R., Raffler,J., Sarwath,H., Thareja,G., Wahl,A.,
- 511 Delisle,R.K., *et al.* (2017) Connecting genetic risk to disease end points through the human blood plasma
- 512 proteome. *Nat. Commun.*, 10.1038/ncomms14357.
- 513 45. Chambers,J.C., Zhang,W., Sehmi,J., Li,X., Wass,M.N., Van Der Harst,P., Holm,H., Sanna,S., Kavousi,M.,
- 514 Baumeister,S.E., *et al.* (2011) Genome-wide association study identifies loci influencing concentrations
- 515 of liver enzymes in plasma. *Nat. Genet.*, 10.1038/ng.970.
- 516 46. Yang,W.H., Nussbaum,C., Grewal,P.K., Marth,J.D. and Sperandio,M. (2012) Coordinated roles of ST3Gal-VI
- 517 and ST3Gal-IV sialyltransferases in the synthesis of selectin ligands. *Blood*, 10.1182/blood-2012-04-
- 518 424366.
- 519 47. Östenson,M., Montén,C., Bacelis,J., Gudjonsdottir,A.H., Adamovic,S., Ek,J., Ascher,H., Pollak,E., Arnell,H.,
- 520 Browaldh,L., *et al.* (2013) A Possible Mechanism behind Autoimmune Disorders Discovered By Genome-
- 521 Wide Linkage and Association Analysis in Celiac Disease. *PLoS One*, 10.1371/journal.pone.0070174.
- 522 48. Slavin,T.P., Feng,T., Schnell,A., Zhu,X. and Elston,R.C. (2011) Two-marker association tests yield new
- 523 disease associations for coronary artery disease and hypertension. *Hum. Genet.*, 10.1007/s00439-011-
- 524 1009-6.
- 525 49. Müller,S.H., Girard,S.L., Hopfner,F., Merner,N.D., Bourassa,C. V., Lorenz,D., Clark,L.N., Tittmann,L., Soto-
- 526 Ortolaza,A.I., Klebe,S., *et al.* (2016) Genome-wide association study in essential tremor identifies three
- 527 new loci. *Brain*, 10.1093/brain/aww242.
- 528 50. Jayaraj,D., Maheswaran,T., Suresh,R. and Ganapathy,N. (2012) Ellis-van Creveld. *J. Pharm. Bioallied Sci.*,
- 529 10.4103/0975-7406.100257.
- 530 51. Temtamy,S.A., Aglan,M.S., Valencia,M., Cocchi,G., Pacheco,M., Ashour,A.M., Amr,K.S., Helmy,S.M.H., El-
- 531 Gammal,M.A., Wright,M., *et al.* (2008) Long interspersed nuclear element-1 (LINE1)-mediated deletion
- 532 of EVC, EVC2, C4orf6, and STK32B in ellis-van Creveld syndrome with borderline intelligence. *Hum.*

- 533 *Mutat.*, 10.1002/humu.20778.
- 534 52. Fatemifar,G., Hoggart,C.J., Paternoster,L., Kemp,J.P., Prokopenko,I., Horikoshi,M., Wright,V.J., Tobias,J.H.,  
535 Richmond,S., Zhurov,A.I., *et al.* (2013) Genome-wide association study of primary tooth eruption  
536 identifies pleiotropic loci associated with height and craniofacial distances. *Hum. Mol. Genet.*,  
537 10.1093/hmg/ddt231.
- 538 53. Kettunen,J., Tukiainen,T., Sarin,A.-P., Ortega-Alonso,A., Tikkanen,E., Lyytikäinen,L.-P., Kangas,A.J.,  
539 Soininen,P., Würtz,P., Silander,K., *et al.* (2012) Genome-wide association study identifies multiple loci  
540 influencing human serum metabolite levels. *Nat. Genet.*, 10.1038/ng.1073.
- 541 54. Goes,F.S., Mcgrath,J., Avramopoulos,D., Wolyniec,P., Pirooznia,M., Ruczinski,I., Nestadt,G., Kenny,E.E.,  
542 Vacic,V., Peters,I., *et al.* (2015) Genome-wide association study of schizophrenia in Ashkenazi Jews. *Am.*  
543 *J. Med. Genet. Part B Neuropsychiatr. Genet.*, 10.1002/ajmg.b.32349.
- 544 55. McKay,J.D., Hung,R.J., Han,Y., Zong,X., Carreras-Torres,R., Christiani,D.C., Caporaso,N.E., Johansson,M.,  
545 Xiao,X., Li,Y., *et al.* (2017) Large-scale association analysis identifies new lung cancer susceptibility loci  
546 and heterogeneity in genetic susceptibility across histological subtypes. *Nat. Genet.*, 10.1038/ng.3892.
- 547 56. Barbalic,M., Dupuis,J., Dehghan,A., Bis,J.C., Hoogetveen,R.C., Schnabel,R.B., Nambi,V., Bretler,M.,  
548 Smith,N.L., Peters,A., *et al.* (2010) Large-scale genomic studies reveal central role of ABO in sP-selectin  
549 and sICAM-1 levels. *Hum. Mol. Genet.*, 10.1093/hmg/ddq061.
- 550 57. Scott,D.W. and Patel,R.P. (2013) Endothelial heterogeneity and adhesion molecules N-glycosylation:  
551 Implications in leukocyte trafficking in inflammation. *Glycobiology*, 10.1093/glycob/cwt014.
- 552 58. Rao,S.P., Wang,Z., Zuberi,R.I., Sikora,L., Bahaie,N.S., Zuraw,B.L., Liu,F.-T. and Sriramarao,P. (2007) Galectin-  
553 3 Functions as an Adhesion Molecule to Support Eosinophil Rolling and Adhesion under Conditions of  
554 Flow. *J. Immunol.*, 10.4049/jimmunol.179.11.7800.
- 555 59. Stowell,S.R., Arthur,C.M., Dias-Baruffi,M., Rodrigues,L.C., Gourdine,J.P., Heimburg-Molinari,J., Ju,T.,  
556 Molinari,R.J., Rivera-Marrero,C., Xia,B., *et al.* (2010) Innate immune lectins kill bacteria expressing blood  
557 group antigen. *Nat. Med.*, 10.1038/nm.2103.
- 558 60. Pradhan,A.D., Rifai,N. and Ridker,P.M. (2002) Soluble intercellular adhesion molecule-1, soluble vascular  
559 adhesion molecule-1, and the development of symptomatic peripheral arterial disease in men.  
560 *Circulation*, 10.1161/01.CIR.0000025636.03561.EE.
- 561 61. Güray,U., Erbay, a R., Güray,Y., Yilmaz,M.B., Boyaci,A.A., Sasmaz,H., Korkmaz,S. and Kütük,E. (2004) Levels  
562 of soluble adhesion molecules in various clinical presentations of coronary atherosclerosis. *Int. J. Cardiol.*,  
563 10.1016/j.ijcard.2003.07.014.
- 564 62. Kiechl,S., Pare,G., Barbalic,M., Qi,L., Dupuis,J., Dehghan,A., Bis,J.C., Laxton,R.C., Xiao,Q., Bonora,E., *et al.*  
565 (2011) Association of variation at the ABO Locus with circulating levels of soluble intercellular adhesion  
566 molecule-1, Soluble P-selectin, and Soluble E-selectin: A meta-analysis. *Circ. Cardiovasc. Genet.*,  
567 10.1161/CIRCGENETICS.111.960682.
- 568 63. Staron,M., Yang,Y., Liu,B., Li,J., Shen,Y., Z????iga-Pfl??cker,J.C., Aguila,H.L., Goldschneider,I. and Li,Z.  
569 (2010) gp96, an endoplasmic reticulum master chaperone for integrins and Toll-like receptors, selectively  
570 regulates early T and B lymphopoiesis. *Blood*, 10.1182/blood-2009-07-233031.
- 571 64. Elices,M.J., Osborn,L., Takada,Y., Crouse,C., Luhowskyj,S., Hemler,M.E. and Lobb,R.R. (1990) VCAM-1 on  
572 activated endothelium interacts with the leukocyte integrin VLA-4 at a site distinct from the VLA-  
573 4/Fibronectin binding site. *Cell*, 10.1016/0092-8674(90)90661-W.
- 574 65. Lonsdale,J., Thomas,J., Salvatore,M., Phillips,R., Lo,E., Shad,S., Hasz,R., Walters,G., Garcia,F., Young,N., *et*  
575 *al.* (2013) The Genotype-Tissue Expression (GTEx) project. *Nat. Genet.*, 10.1038/ng.2653.
- 576 66. Trigueros-Motos,L., Van Capelleveen,J.C., Torta,F., Castao,D., Zhang,L.H., Chai,E.C., Kang,M., Dimova,L.G.,  
577 Schimmel,A.W.M., Tietjen,I., *et al.* (2017) ABCA8 regulates cholesterol efflux and high-density lipoprotein  
578 cholesterol levels. *Arterioscler. Thromb. Vasc. Biol.*, 10.1161/ATVBAHA.117.309574.
- 579 67. Dimayuga,P., Zhu,J., Oguchi,S., Chyu,K.Y., Xu,X.O.H., Yano,J., Shah,P.K., Nilsson,J. and Cercek,B. (1999)  
580 Reconstituted HDL containing human apolipoprotein A-1 reduces VCAM-1 expression and neointima  
581 formation following periaortic cuff-induced carotid injury in apoE null mice. *Biochem. Biophys. Res.*  
582 *Commun.*, 10.1006/bbrc.1999.1278.

- 583 68. Cockerill,G.W., Rye,K.A., Gamble,J.R., Vadas,M.A. and Barter,P.J. (1995) High-Density Lipoproteins Inhibit  
584 Cytokine-Induced Expression of Endothelial Cell Adhesion Molecules. *Arterioscler. Thromb. Vasc. Biol.*,  
585 10.1161/01.ATV.15.11.1987.
- 586 69. Kim,W.S., Hsiao,J.-H.T., Bhatia,S., Glaros,E.N., Don,A.S., Tsuruoka,S., Shannon Weickert,C. and  
587 Halliday,G.M. (2013) ABCA8 stimulates sphingomyelin production in oligodendrocytes. *Biochem. J.*,  
588 10.1042/BJ20121764.
- 589 70. Döring,Y., Noels,H., Mandl,M., Kramp,B., Neideck,C., Lievens,D., Drechsler,M., Megens,R.T.A., Tilstam,P.  
590 V., Langer,M., *et al.* (2014) Deficiency of the sialyltransferase St3Gal4 reduces Ccl5-mediated myeloid  
591 cell recruitment and arrest. *Circ. Res.*, 10.1161/CIRCRESAHA.114.302426.
- 592 71. Parris,T.Z., Aziz,L., Kovács,A., Hajizadeh,S., Nemes,S., Semaan,M., Chen,C.Y., Karlsson,P. and Helou,K.  
593 (2014) Clinical relevance of breast cancer-related genes as potential biomarkers for oral squamous cell  
594 carcinoma. *BMC Cancer*, 10.1186/1471-2407-14-324.
- 595 72. Liang,R., Hinds,R., Abud,H.E. and Cheng,W. (2013) Hedgehog signalling is downregulated in celiac disease.  
596 *Can. J. Gastroenterol.*
- 597 73. Moran,C.M., Myers,C.T., Lewis,C.M. and Krieg,P.A. (2012) Hedgehog regulates angiogenesis of  
598 intersegmental vessels through the VEGF signaling pathway. *Dev. Dyn.*, 10.1002/dvdy.23795.
- 599 74. Wolf,S., Mertens,D., Schaffner,C., Korz,C., Dohner,H., Stilgenbauer,S. and Lichter,P. (2001) B-cell neoplasia  
600 associated gene with multiple splicing (BCMS): the candidate B-CLL gene on 13q14 comprises more than  
601 560 kb covering all critical regions. *Hum Mol Genet.*
- 602 75. Ouillette,P., Erba,H., Kujawski,L., Kaminski,M., Shedden,K. and Malek,S.N. (2008) Integrated genomic  
603 profiling of chronic lymphocytic leukemia identifies subtypes of deletion 13q14. *Cancer Res.*,  
604 10.1158/0008-5472.CAN-07-3105.
- 605 76. Garding,A., Bhattacharya,N., Claus,R., Ruppel,M., Tschuch,C., Filarsky,K., Idler,I., Zucknick,M., Caudron-  
606 Herger,M., Oakes,C., *et al.* (2013) Epigenetic Upregulation of lncRNAs at 13q14.3 in Leukemia Is Linked  
607 to the In Cis Downregulation of a Gene Cluster That Targets NF- $\kappa$ B. *PLoS Genet.*,  
608 10.1371/journal.pgen.1003373.
- 609 77. Schütze,S., Wiegmann,K., Machleidt,T. and Krönke,M. (1995) TNF-induced activation of NF- $\kappa$ B.  
610 *Immunobiology.*
- 611 78. Mao,X., Su,Z. and Mookhtiar,A.K. (2017) Long non-coding RNA: A versatile regulator of the nuclear factor-  
612  $\kappa$ B signalling circuit. *Immunology*, 10.1111/imm.12698.
- 613 79. Hatzikotoulas,K., Gilly,A. and Zeggini,E. (2014) Using population isolates in genetic association studies.  
614 *Brief. Funct. Genomics*, 10.1093/bfpg/elu022.
- 615  
616

## 617 Acknowledgements

618 We gratefully acknowledge the contributions of the participants in the Northern Finland Birth Cohort 1966  
619 study. We also thank all the field workers and laboratory personnel for their efforts. Data on coronary artery  
620 disease / myocardial infarction have been contributed by CARDIoGRAMplusC4D investigators and have been  
621 downloaded from [www.CARDIOGRAMPLUSC4D.ORG](http://www.CARDIOGRAMPLUSC4D.ORG).

## 622 Funding

623 This work was supported by University of Oulu Graduate School [ES, MK], the Finnish Foundation for  
624 Cardiovascular Research [VS], Biocenter Oulu [SS], European Commission [DynaHEALTH – H2020 – 633595,  
625 SS], Academy of Finland [297338 and 307247, JK] and Novo Nordisk Foundation [NNF17OC0026062, JK].  
626 NFBC1966 received financial support from University of Oulu Grant no. 65354, Oulu University Hospital Grant  
627 no. 2/97, 8/97, Ministry of Health and Social Affairs Grant no. 23/251/97, 160/97, 190/97, National Institute  
628 for Health and Welfare, Helsinki Grant no. 54121, Regional Institute of Occupational Health, Oulu, Finland  
629 Grant no. 50621, 54231. The Young Finns Study has been financially supported by the Academy of Finland:  
630 [grants 286284, 134309 (Eye), 126925, 121584, 124282, 129378 (Salve), 117787 (Gendi), and 41071 (Skidi)];  
631 the Social Insurance Institution of Finland; Competitive State Research Financing of the Expert Responsibility  
632 area of Kuopio, Tampere and Turku University Hospitals [grant X51001]; Juho Vainio Foundation; Paavo  
633 Nurmi Foundation; Finnish Foundation for Cardiovascular Research ; Finnish Cultural Foundation; The Sigrid  
634 Juselius Foundation; Tampere Tuberculosis Foundation; Emil Aaltonen Foundation; Yrjö Jahnsson  
635 Foundation; Signe and Ane Gyllenberg Foundation; Diabetes Research Foundation of Finnish Diabetes  
636 Association; and EU Horizon 2020 [grant 755320 for TAXINOMISIS]; and European Research Council [grant  
637 742927 for MULTIEPIGEN project]; Tampere University Hospital Supporting Foundation.

638 **Conflict of Interest**

639 VS has participated in a conference trip sponsored by Novo Nordisk and received a honorarium from the  
640 same source for participating in and advisory board meeting. He also has ongoing research collaboration with  
641 Bayer Ltd.



## 642 Tables

643 Table 1. Basic characteristics of the NFBC1966 study population.

| <b>Characteristics</b>         |              |
|--------------------------------|--------------|
| Total number of individuals    | 5284         |
| Number of males (%)            | 2543 (48.1)  |
| Age, years                     | 31.1 ± 0.4   |
| BMI, kg/m <sup>2</sup>         | 24.4 ± 4.0   |
| Glucose, mmol/l                | 5.1 ± 0.7    |
| LDL-cholesterol, mmol/l        | 3.0 ± 0.9    |
| HDL-cholesterol, mmol/l        | 1.6 ± 0.4    |
| Systolic blood pressure, mmHg  | 124.2 ± 13.6 |
| Diastolic blood pressure, mmHg | 76.8 ± 11.7  |

Values are mean ± standard deviation.

644

645 Table 2. Significant loci associating with the circulating inflammatory phenotypes.

| Study          | Marker       | Locus          | Chr:Position        | Candidate gene        | Nearest gene(s)       | Annotation           | dbSNP reference    | EA                 | EAF          | Beta          | P-value           | Variance explained | Total variance explained |       |
|----------------|--------------|----------------|---------------------|-----------------------|-----------------------|----------------------|--------------------|--------------------|--------------|---------------|-------------------|--------------------|--------------------------|-------|
| NFBC1966       | sE-Selectin  | 9q34.2         | 9:136141870         | <i>ABO</i>            | <i>ABO</i>            | Intronic             | rs2519093          | T                  | 0.188        | -0.903        | 4.48E-305         | 0.249              | 0.258                    |       |
|                |              | <b>11q24.2</b> | <b>11:126266665</b> | <b><i>ST3GAL4</i></b> | <b><i>ST3GAL4</i></b> | <b>Intronic</b>      | <b>rs11220471</b>  | <b>G</b>           | <b>0.212</b> | <b>-0.162</b> | <b>7.72E-12</b>   | <b>0.009</b>       |                          |       |
|                | sICAM-1      | 9q34.2         | 9:136141870         | <i>ABO</i>            | <i>ABO</i>            | Intronic             | rs2519093          | T                  | 0.188        | -0.352        | 7.43E-48          | 0.038              | 0.118                    |       |
|                |              | 19p13.2        | 19:10383403         | <i>ICAM1</i>          | <i>ICAM1</i>          | Intronic             | rs117960796        | A                  | 0.012        | -1.669        | 8.03E-40          | 0.066              |                          |       |
|                | sVCAM-1      | <b>9q34.2</b>  | 19p13.2             | 19:10497360           | <i>ICAM1</i>          | <i>CDC37</i>         | Intergenic         | rs74428614         | A            | 0.163         | 0.226             | 1.14E-16 *         | 0.014                    | 0.038 |
|                |              |                | <b>12q23.3</b>      | <b>12:104448391</b>   | <b><i>HSP90B1</i></b> | <b><i>GLT8D2</i></b> | <b>Intronic</b>    | <b>rs117238625</b> | <b>A</b>     | <b>0.023</b>  | <b>0.510</b>      | <b>2.90E-14</b>    | <b>0.012</b>             |       |
| <b>17q24.2</b> |              |                | <b>17:66823805</b>  | <b><i>ABCA8</i></b>   | <b><i>ABCA8</i></b>   | <b>Intergenic</b>    | <b>rs112001035</b> | <b>A</b>           | <b>0.060</b> | <b>-0.324</b> | <b>1.04E-13</b>   | <b>0.012</b>       |                          |       |
| meta-analyses  | IL1 $\beta$  | <b>6p22.1</b>  | <b>6:30017071</b>   |                       | <i>HLA locus</i>      | <b>Intronic</b>      | <b>rs6917603</b>   | <b>C</b>           | <b>0.251</b> | <b>-0.163</b> | <b>1.76E-12</b>   | <b>0.010</b>       | 0.015                    |       |
|                |              | <b>6p22.1</b>  | <b>6:30013887</b>   |                       | <i>HLA locus</i>      | <b>Intronic</b>      | <b>rs9261224</b>   | <b>T</b>           | <b>0.035</b> | <b>0.261</b>  | <b>1.31E-09 *</b> | <b>0.005</b>       |                          |       |
|                | IP10         | 4q21.1         | 4:76899176          | <i>CXCL10</i>         | <i>SAD1</i>           | Intronic             | rs192716315        | C                  | 0.003        | 1.513         | 2.71E-13          | 0.014              | 0.014                    |       |
|                | MCP1         | 1q23.2         | 1:159175354         | <i>ACKR1</i>          | <i>ACKR1</i>          | Missense             | rs12075            | G                  | 0.561        | 0.125         | 1.90E-24          | 0.008              | 0.008                    |       |
|                | TNF $\alpha$ | <b>13q14.3</b> | <b>13:51141997</b>  | <b><i>DLEU1</i></b>   | <b><i>DLEU1</i></b>   | <b>Intronic</b>      | <b>rs17074575</b>  | <b>G</b>           | <b>0.002</b> | <b>2.131</b>  | <b>2.71E-09</b>   | <b>0.018</b>       | 0.018                    |       |
|                | VEGF         | <b>4p16.2</b>  | <b>4:5636073</b>    | <b><i>STK32B</i></b>  | <b><i>EVC2</i></b>    | <b>Intronic</b>      | <b>rs186725382</b> | <b>A</b>           | <b>0.001</b> | <b>-2.380</b> | <b>4.53E-10</b>   | <b>0.011</b>       | 0.052                    |       |
|                |              | 6p21.1         | 6:43927050          | <i>VEGFA</i>          | <i>C6orf223</i>       | Intergenic           | rs7767396          | G                  | 0.422        | 0.272         | 4.95E-96          | 0.036              |                          |       |
| 9p24.2         | 9:2686273    | <i>VLDLR</i>   | <i>VLDLR, KCNV2</i> | Intergenic            | rs7030781             | T                    | 0.373              | 0.099              | 1.57E-13     | 0.005         |                   |                    |                          |       |

Statistical significance is considered at  $p < 3.1 \times 10^{-9}$ . Novel findings are highlighted with bold font. All positions correspond to human genome build 37. Asterisk (\*) indicates associations that are significant after conditioning the analyses on the locus specific lead variant on the preceding row. EA, effect allele; EAF, effect allele frequency.

647 **Figures**

648 **Figure 1.** The combined Manhattan plots for significant associations with inflammatory markers studied in (A)

649 NFBC1966 and in (B) meta-analyses with three other Finnish population cohorts.

650 Significance threshold  $p < 3.1 \times 10^{-9}$  derives from the standard p-value limit for genome-wide significance

651  $p < 5 \times 10^{-8}$  corrected for 16 markers examined in the present study. Novel association signals are highlighted

652 with red font and replicated loci are marked with black font.

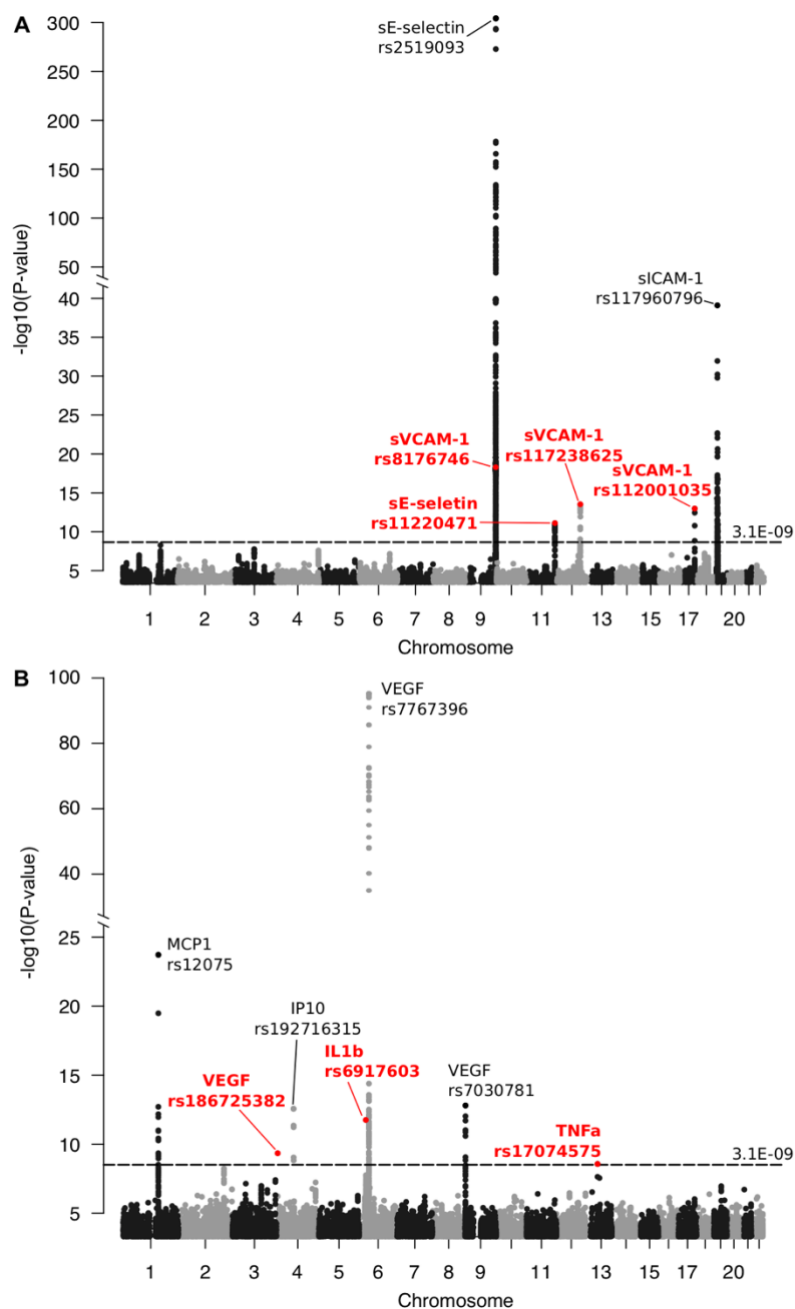

653

654 Figure 2. The effects of the ABO blood types and the A1 subtype on soluble adhesion molecule levels.

655 The effects of the ABO blood types on sE-selectin, sICAM-1 and sVCAM-1 levels were evaluated in linear  
 656 models, where adjusted (sex, age, BMI, and the ten first genetic principal components) and transformed  
 657 soluble adhesion molecule concentrations were used as outcomes and the ABO blood type served as  
 658 categorical variable (A versus non-A, etc.). Corresponding models were fitted for the ABO blood types  
 659 stratified by the rs507666-A allele count (0, 1 or 2), where the A allele tags the ABO subtype A1 having  
 660 enhanced glycosyltransferase activity (25). No individuals were found to have B or O blood type and one or  
 661 more copies of the rs507666-A allele and, thus, it was not possible to perform stratification within these  
 662 blood types.

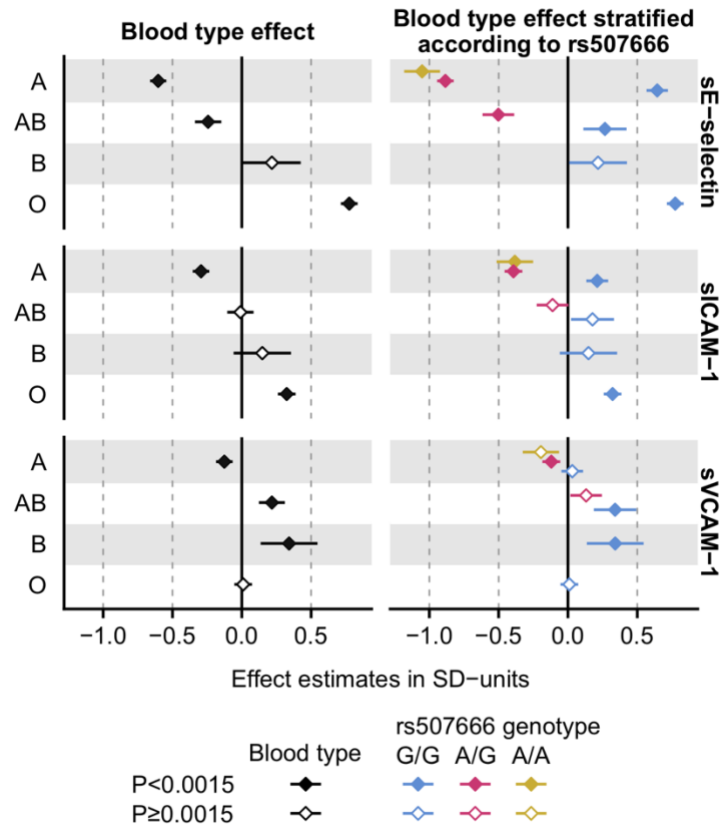

663

664 Figure 3. The correlations of the SNP effects on soluble adhesion molecule levels versus other cardiovascular  
 665 health-related traits at the *ABO* locus.

666 The correspondence of the SNP effects on inflammatory phenotypes versus cardiovascular health-related  
 667 traits were determined for the SNPs associating with (A) sE-selectin, (B) sICAM-1, and (C) sVCAM-1 levels at  
 668 the *ABO* locus. SNP effects on coronary artery disease (CAD), stroke, and LDL-C or HDL-C were extracted from  
 669 CARDIoGRAM (26), Stroke Consortia (27), and a metabolomics GWAS (28) summary statistics, respectively.  
 670 The correlations (Pearson's  $r$ ) of the genetic effects were estimated using subsets of representative SNPs  
 671 extracted from the summary statistics of the present GWAS using a clumping function in PLINK and  $r^2$   
 672 threshold of 0.2. Prior to clumping, data were filtered to include only the SNPs available in all the three  
 673 datasets. Correlations with  $p \geq 0.05$  are marked with a cross. The SNPs used for estimating the correlations  
 674 are listed in Table S5 and scatter plot representations as well as correlations at the other loci and other  
 675 inflammatory phenotypes are shown in Figure S3.

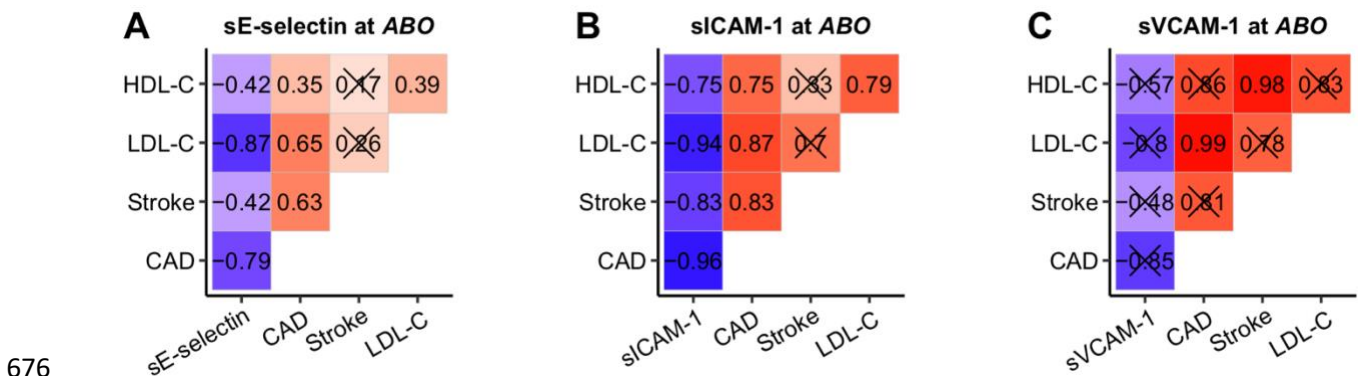

Source: https://www.biorxiv.org/content/biorxiv/early/2018/12/10/491852.full.pdf
